# Supplementary material for: Fossil and Genetic Evidence for the Polyphyletic Nature of the Planktonic Foraminifera "Globigerinoides", and Description of the New Genus Trilobatus
Source: PLoS One. 2015 May 28;10(5):e0128108. doi: 10.1371/journal.pone.0128108 (PMC4447400; doi:10.1371/journal.pone.0128108)
Supplement: S1 Table — All DSDP and ODP cores are stored at DSDP and ODP Repositories BCR = Bremen Core Repository, Germany; GCR = Gulf Coast Repository, USA; KCR = Kochi Core Repository, Japan). Samples are stored at the University of Milano Dipartimento Scienze della Terra “Ardito Desio, Via Mangiagalli 34, 20133 Milano, Italy (UniMi) at the University of Fribourg, Department of Geosciences, Chemin du Musée 6, 1700, Fribourg, Switzerland (UniFr) or at the University of Vienna, Department of Palaeontology, Althanstraße 14, 1090 Vienna (UniVie). In the table are also the details of the type specimen of the new genus Trilobatus. (XLSX) [file pone.0128108.s001.xlsx]

## Sheet: Sheet1
Hole /Section	Region	Latitude	Longitude	studied cores	water depth	Sample	DSDP/ODP
					(in m)	Stored	core Repositories
DSDP-116	North Atlantic	57°29.76'N	01°14.26'O	13 to 22	1151	UniMi	BCR
DSDP-548A	North Atlantic	48°54.93'N	12°09.87'O	14-16	1251	UniMi	BCR
DSDP-98	Gulf of Mexico	25°22.95'N	77°18.68'O	5	2750	UniMi	GCR
DSDP-94	Gulf of Mexico	24°31.64'N	88°28.16'O	9 to 11	1793	UniMi	GCR
DSDP-151	Gulf of Mexico	16°01.02'N	73°24.58'O	4 to 9	2029	UniMi	GCR
DSDP-153	Gulf of Mexico	13°58.33'N	72°26.08'O	5 to 6	3932	UniMi	GCR
DSDP-538A	Caribbean	23°50.98'N	85°10.26'O	2 to 14	2740	UniMi	BCR
DSDP-354	Equatorial Atlantic	08°53.95'N	44°11.78'O	6 to 12	4062	UniMi	BCR
DSDP-667A	Equatorial Atlantic	04°34.15'S	21°54.68'O	26 to 35	3529.5	UniMi	BCR
DSDP-363	South Atlantic	19°38.75'S	08°02.80'E	1 to 5	2248	UniMi	BCR
DSDP-522	Western South Atlantic	26°06.843'S	05°07.784'O	14 to 22	4441	UniMi	BCR
DSDP-526A	Western South Atlantic	30°08.36'S	03°08.28'E	24 to 33	1064	UniMi	BCR
DSDP-329	Western South Atlantic	50°29.31'S	46°05.73'O	27 to 29	1519	UniMi	BCR
DSDP-17A	Western South Atlantic	28°02.74'S	36°.15'O	1 to 2	4266	UniMi	BCR
DSDP-516F	Westen South Atlantic	30°16.59'S	36°.17.10'O	1 to 20	1313	UniMi	BCR
DSDP-360	Easten South Atlantic	35°50.75'S	18°.05.79'E	23 to 30	2949	UniMi	BCR
DSDP-588C	South Pacific (Tasman Sea)	26°07.07'S	16°.13.06'E	1 to 17	1533	UniMi	GCR
DSDP-593	South Pacific (Tasman Sea)	40°30.47'S	16°.40.47'E	48 to 50	1068	UniMi	GCR
ODP-706A	Indian Ocean	13°06.85'S	61°.22.26'E	2 to 4	2504.3	UniMi	KCR
ODP-706B	Indian Ocean	13°06.86'S	61°.22.26'E	2 to 6	2507.8	UniMi	KCR
ODP-707A	Indian Ocean	07°32.72'S	59°.01.01'E	15 to 17	1552.3	UniMi	KCR
ODP-708A	Indian Ocean	05°27.35'S	59°.56.62'E	20-25	4109.3	UniMi	KCR
ODP-709A	Indian Ocean	03°54.90'S	60°.33.10'E	21	3040.8	UniMi	KCR
ODP-709B	Indian Ocean	03°54.90'S	60°.33.10'E	21 to 27	3040.8	UniMi	KCR
ODP-709C	Indian Ocean	03°54.90'S	60°.33.10'E	18 to 27	3040.8	UniMi	KCR
ODP-710A	Indian Ocean	04°18.70'S	60°.58.80'E	16 to 22	3824.3	UniMi	KCR
ODP-714A	Indian Ocean	05°03.06'N	73°.47.02'E	19 to 24	2038.3	UniMi	KCR
ODP-118D	Greenland Margin	63°05.572'N	38°38.334'W	54 to 85	1868.2	UniMi	BCR
ODP-1137A	Kerguelen Plateau	56°50.0´S	68°05.6´E	12 to 13	1016	UniFr	KCR
Lemme Section	Nothern Italy	44°65.89'N	8°83.64'E	64 samples	Outcrop	UniMi	N/A
Martillac Section	Western France	44°42.445'N	34°28.06W	4 samples	Outcrop	UniFr	N/A
Cipero and Lengua Formation	Trinidad	various	localities	Bolli 362, 381, 407, 408, 496	Outcrop	UniFr	N/A
Cipero and Lengua Formation	Trinidad	various	localities	PJ250, PJ261, PJ262, Pj258, PJ271	Outcrop
Laa an der Taya	Austria	48°43.07'N	16°23.14'E	13 samples	Outcrop	UniVie	N/A
Trilobatus trilobus n. gen.
Type locality	Saltmine Wieliczka near Krakow, Poland.
Repository	Micropalaeontological Collection of the Department
	of Geology & Palaeontology, Natural History Museum Vienna
Reference number	NHMW 2011/0341/0001
Origin	Selected from original
	material of A.E. Reuss, collection number 1867/0034/0037
