# Supplementary material for: Fossil and Genetic Evidence for the Polyphyletic Nature of the Planktonic Foraminifera "Globigerinoides", and Description of the New Genus Trilobatus
Source: PLoS One. 2015 May 28;10(5):e0128108. doi: 10.1371/journal.pone.0128108 (PMC4447400; doi:10.1371/journal.pone.0128108)
Supplement: S2 Table — (XLSX) [file pone.0128108.s002.xlsx]

## Sheet: S2
Globigerinoides primordius
Max. width	Max. height	Width/Height	Large angle	Small angle	L/S
0.109	0.053	2.0566	91.561	78.832	1.16147
0.13	0.078	1.66667	84.255	75.044	1.12274
0.185	0.066	2.80303	85.463	64.593	1.3231
0.126	0.044	2.86364	110.164	75.923	1.451
0.103	0.065	1.58462	97.877	78.76	1.24272
0.105	0.052	2.01923	93.473	73.273	1.27568
0.177	0.101	1.75248	66.386	55.959	1.18633
0.091	0.065	1.4	92.911	72.988	1.27296
0.09	0.07	1.28571	105.709	87.628	1.20634
0.109	0.066	1.65152	82.875	69.28	1.19623
0.086	0.066	1.30303	88.995	79.087	1.12528
0.118	0.067	1.76119	104.839	61.04	1.71755
0.093	0.073	1.27397	83.182	77.284	1.07632
0.135	0.072	1.875	91.205	59.589	1.53057
0.137	0.079	1.73418	88.789	62.496	1.42071
0.105	0.072	1.45833	74.84	73.989	1.0115
0.176	0.062	2.83871	74.403	47.341	1.57164
0.116	0.055	2.10909	112.328	97.577	1.15117
0.109	0.052	2.09615	104.036	91.679	1.13479
0.124	0.088	1.40909	97.194	96.173	1.01062
0.116	0.086	1.34884	79.852	73.344	1.08873
0.127	0.064	1.98438	96.783	81.778	1.18348
0.107	0.067	1.59701	96.771	85.73	1.12879
0.0112	0.094	0.119149	102.09	82.408	1.23884
0.178	0.069	2.57971	82.482	82.439	1.00052
0.08	0.039	2.05128	103.285	57.751	1.78845
0.136	0.051	2.66667	86.939	46.909	1.85335
0.117	0.05	2.34	103.509	65.094	1.59015
0.133	0.03	4.43333	85.389	77.784	1.09777
0.155	0.087	1.78161	72.35	70.155	1.03129
0.16	0.057	2.80702	80.175	73.101	1.09677
0.117	0.073	1.60274	85.518	85.03	1.00574
0.086	0.049	1.7551	69.574	59.727	1.16487
0.137	0.115	1.1913	112.101	80.111	1.39932
0.097	0.07	1.38571	101.785	92.932	1.09526
0.105	0.07	1.5	117.815	111.007	1.06133
0.088	0.051	1.72549	106.653	90.721	1.17562
0.08	0.074	1.08108	83.793	71.44	1.17291
0.134	0.089	1.50562	103.782	100.933	1.02823
0.095	0.048	1.97917	70.145	58.367	1.20179
0.1	0.073	1.36986	111.161	86.09	1.29122
0.122	0.056	2.17857	67.906	64.5	1.05281
0.087	0.06	1.45	101.911	83.384	1.22219
0.176	0.044	4	94.869	79.42	1.19452
0.178	0.114	1.5614	98.694	78.971	1.24975
0.128	0.09	1.42222	88.234	77.647	1.13635
0.078	0.059	1.32203	83.884	73.163	1.14654
0.078	0.05	1.56	108.92	84.391	1.29066
0.104	0.059	1.76271	99.104	81.506	1.21591
0.079	0.079	1	124.64	107.359	1.16096
0.121	0.09	1.34444	110.632	86.774	1.27494
0.113	0.073	1.54795	98.027	90.503	1.08314
0.102	0.058	1.75862	119.932	90	1.33258
0.15	0.065	2.30769	86.435	69.396	1.24553
0.075	0.061	1.22951	116.902	95.217	1.22774
0.139	0.052	2.67308	86.464	73.686	1.17341
0.088	0.076	1.15789	98.114	76.549	1.28171
0.126	0.1	1.26	97.98	73.325	1.33624
0.099	0.065	1.52308	82.339	80.993	1.01662
0.05	0.049	1.02041	128.82	103.281	1.24728
0.136	0.075	1.81333	93.93	76.746	1.22391
0.135	0.089	1.51685	106.763	77.114	1.38448
0.123	0.065	1.89231	87.016	78.92	1.10258
0.115	0.069	1.66667	100	74.604	1.34041
0.09	0.051	1.76471	114.905	95.528	1.20284
0.115	0.045	2.55556	87.357	58.285	1.49879
0.12	0.1	1.2	102.17	86.6	1.17979
0.17	0.087	1.95402	75.73	56.875	1.33152
0.138	0.073	1.89041	96.409	85.601	1.12626
0.155	0.064	2.42188	82.499	54.159	1.52327
0.084	0.047	1.78723	142.943	99.273	1.4399
0.111	0.055	2.01818	99.246	60.277	1.6465
0.101	0.063	1.60317	104.573	82.929	1.26099
0.097	0.088	1.10227	131.507	99.27	1.32474
0.085	0.058	1.46552	78.753	75.299	1.04587
0.152	0.077	1.97403	87.889	53.837	1.6325
0.122	0.068	1.79412	90.188	82.514	1.093
0.118	0.054	2.18519	86.309	71.309	1.21035
0.117	0.067	1.74627	87.899	87.254	1.00739
0.127	0.075	1.69333	80.789	79.618	1.01471
0.125	0.066	1.89394	90.538	69.546	1.30184
0.066	0.06	1.1	112.847	104.177	1.08322
0.076	0.063	1.20635	83.188	80.073	1.0389
0.101	0.064	1.57812	84.936	72.646	1.16918
0.088	0.047	1.87234	75.593	57.995	1.30344
0.075	0.043	1.74419	108.435	102.529	1.0576
0.114	0.065	1.75385	88.807	76.367	1.1629
0.096	0.056	1.71429	80.362	57.585	1.39554
0.097	0.062	1.56452	134.094	110.45	1.21407
0.058	0.057	1.01754	124.133	115.299	1.07662
0.075	0.063	1.19048	124.246	85.128	1.45952
0.059	0.047	1.25532	107.656	81.656	1.31841
0.129	0.064	2.01562	101.54	53.864	1.88512
0.086	0.041	2.09756	95.003	59.452	1.59798
0.136	0.065	2.09231	109.766	98.113	1.11877
0.072	0.031	2.32258	116.18	76.215	1.52437
0.072	0.046	1.56522	89.091	84.699	1.05185
0.116	0.059	1.9661	85.386	74.253	1.14993
0.132	0.087	1.51724	125.838	85.344	1.47448
0.076	0.042	1.80952	95.281	73.149	1.30256
0.111	0.047	2.3617	74.055	45.244	1.63679
0.161	0.053	3.03774	58.073	55.464	1.04704
0.127	0.065	1.95385	116.565	81.518	1.42993
0.125	0.075	1.66667	90	47.617	1.89008
0.134	0.069	1.94203	74.829	69.736	1.07303
0.122	0.082	1.4878	93.874	67.586	1.38896
0.083	0.058	1.43103	91.941	78.608	1.16961
0.073	0.065	1.12308	96.17	92.698	1.03745
0.089	0.061	1.45902	155.556	96.272	1.6158
0.157	0.053	2.96226	60.552	55.293	1.09511
0.083	0.077	1.07792	105.68	99.02	1.06726
0.128	0.054	2.37037	55.474	52.253	1.06164
0.134	0.063	2.12698	81.161	63.53	1.27752
0.12	0.095	1.26316	101.79	87.537	1.16282
0.101	0.06	1.68333	87.094	77.532	1.12333
0.122	0.066	1.84848	94.799	54.368	1.74365
0.095	0.07	1.35714	81.688	74.291	1.09957
0.094	0.059	1.59322	90.436	90	1.00484
0.086	0.139	0.618705	135	108.083	1.24904
0.152	0.069	2.2029	78.374	67.822	1.15558
0.126	0.094	1.34043	86.851	86.671	1.00208
0.131	0.044	2.97727	96.752	62.143	1.55693
0.101	0.103	0.980583	112.671	83.949	1.34214
0.132	0.074	1.78378	110.854	86.621	1.27976
0.111	0.064	1.73438	85.961	73.034	1.177
0.123	0.06	2.05	76.029	72.423	1.04979
0.083	0.062	1.33871	113.571	89.236	1.2727
0.106	0.069	1.53623	81.974	78.69	1.04173
0.077	0.051	1.5098	131.295	92.88	1.4136
0.09	0.052	1.73077	90.714	63.435	1.43003
0.111	0.067	1.65672	88.808	65.302	1.35996
0.119	0.077	1.54545	100.721	71.966	1.39956
0.113	0.084	1.34524	137.69	90.615	1.51951
0.127	0.079	1.60759	83.362	81.279	1.02563
0.104	0.056	1.85714	87.653	63.184	1.38727
0.138	0.054	2.55556	67.042	48.11	1.39351
0.141	0.049	2.87755	79.099	50.35	1.57098
0.123	0.086	1.43023	95.117	93.175	1.02084
0.099	0.102	0.970588	150.786	116.953	1.28929
0.136	0.07	1.94286	86.82	58.799	1.47656
0.15	0.07	2.14286	109.489	96.642	1.13293
0.12	0.084	1.42857	112.782	91.479	1.23287
0.151	0.055	2.74545	69.695	64.861	1.07453
0.072	0.057	1.26316	121.373	56.547	2.14641
0.131	0.037	3.54054	78.503	58.392	1.34441
0.133	0.073	1.82192	82.569	72.339	1.14142
0.135	0.077	1.75325	75.067	62.084	1.20912
0.143	0.077	1.85714	120.706	78.936	1.52916
0.14	0.087	1.6092	95.244	64.598	1.47441
0.13	0.078	1.66667	101.81	92.353	1.1024
0.127	0.067	1.89552	121.297	74.997	1.61736
0.13	0.08	1.625	104.323	91.948	1.13459
0.078	0.069	1.13043	115.896	93.353	1.24148
0.127	0.083	1.53012	75.683	74.828	1.01143
0.097	0.049	1.97959	74.243	63.435	1.17038
0.117	0.083	1.40964	110.499	101.87	1.08471
0.066	0.05	1.32	117.597	67.817	1.73403
0.094	0.104	0.903846	132.55	96.882	1.36816
0.129	0.076	1.69737	106.368	76.503	1.39038
0.088	0.061	1.44262	101.889	77.202	1.31977
0.081	0.027	3	88.152	79.306	1.11154
0.107	0.087	1.22989	94.199	81.311	1.1585
0.092	0.08	1.15	103.672	72.927	1.42159
0.11	0.056	1.96429	103.093	79.93	1.28979
0.116	0.061	1.90164	111.801	98.939	1.13
0.062	0.041	1.5122	112.708	94.17	1.19686
0.082	0.047	1.74468	93.327	83.83	1.11329
0.101	0.048	2.10417	114.228	91.507	1.2483
0.083	0.077	1.07792	99.128	93.033	1.06551
0.106	0.046	2.30435	89.215	63.931	1.39549
0.136	0.074	1.83784	112.62	58.159	1.93642
0.111	0.069	1.6087	92.716	62.689	1.47898
0.085	0.077	1.1039	111.801	88.173	1.26797
0.129	0.054	2.38889	87.776	46.351	1.89372
0.123	0.055	2.23636	74.105	62.263	1.19019
0.138	0.069	2	94.904	67.765	1.40049
0.067	0.052	1.28846	87.639	80.776	1.08496
0.117	0.065	1.8	76.898	76.885	1.00017
0.107	0.048	2.22917	112.493	77.724	1.44734
0.121	0.041	2.95122	80.811	69.366	1.16499
0.104	0.069	1.50725	100.457	90.173	1.11405
0.074	0.043	1.72093	95.102	76.759	1.23897
0.055	0.04	1.375	90.966	81.87	1.1111
0.098	0.068	1.44118	114.594	81.18	1.4116
0.099	0.074	1.33784	100.751	91.167	1.10513
0.141	0.061	2.31148	102.802	99.486	1.03333
0.127	0.091	1.3956	92.255	66.038	1.397
0.075	0.045	1.66667	115.799	95.389	1.21397
0.127	0.067	1.89552	94.152	79.288	1.18747
0.075	0.055	1.36364	116.375	83.452	1.39451
0.121	0.075	1.61333	96.683	68.35	1.41453
0.082	0.044	1.86364	86.326	61.442	1.405
0.102	0.097	1.05155	107.241	103.594	1.0352
0.113	0.086	1.31395	95.315	82.057	1.16157
0.106	0.064	1.65625	107.909	69.939	1.5429
0.117	0.065	1.8	92.832	74.205	1.25102
0.116	0.061	1.90164	119.152	93.445	1.2751
0.185	0.077	2.4026	88.089	67.1	1.3128
0.108	0.06	1.8	100.911	72.739	1.3873
0.165	0.062	2.66129	90.644	45.515	1.99152
