# Supplementary material for: Fossil and Genetic Evidence for the Polyphyletic Nature of the Planktonic Foraminifera "Globigerinoides", and Description of the New Genus Trilobatus
Source: PLoS One. 2015 May 28;10(5):e0128108. doi: 10.1371/journal.pone.0128108 (PMC4447400; doi:10.1371/journal.pone.0128108)
Supplement: S3 Table — (XLSX) [file pone.0128108.s003.xlsx]

## Sheet: S3
Globigerinoides primordius						Globigerinoides quadrilobatus						Globigerinoides trilobus						Globigerinoides altiaperturus						Globigerinoides subsacculifer						Globigerinoides immaturus						Globoturborotalita woodi						Globigerinoides parawoodi						Globigerinoides subquadratus
Max. width	Max. height	Width/Height	Large angle	Small angle	L/S	Max. width	Max. height	Width/Height	Large angle	Small angle	L/S	Max. width	Max. height	Width/Height	Large angle	Small angle	L/S	Max. width	Max. height	Width/Height	Large angle	Small angle	L/S	Max. width	Max. height	Width/Height	Large angle	Small ange	L/S	Max. width	Max. height	Width/Height	Large angle	Small angle	L/S	Max. width	Max. height	Width/Height	Angle L	Angle R	L/S	Max. width	Max. height	Width/Height	Angle L	Angle R	L/S	Max. width	Max. height
0.153	0.05	3.06	77.84	47.84	1.62709	0.108	0.041	2.63415	95.618	95.194	1.00445	0.158	0.052	3.03846	64.225	45.637	1.4073	0.13	0.114	1.14035	99.28	80.91	1.22704	0.086	0.077	1.11688	100.788	96.37	1.04584	0.122	0.059	2.0678	109.396	76.077	1.43796	0.108	0.084	1.28571	125.687	106.489	1.18028	0.052	0.043	1.2093	101.31	87.486	1.15801	0.093	0.115
0.152	0.094	1.61702	89.895	75.605	1.18901	0.146	0.107	1.36449	88.127	87.474	1.00747							0.088	0.066	1.33333	99.788	97.253	1.02607	0.102	0.067	1.52239	88.116	85.477	1.03087	0.202	0.075	2.69333	78.528	72.377	1.08499	0.095	0.071	1.33803	91.188	68.749	1.32639	0.117	0.07	1.67143	82.329	79.391	1.03701	0.097	0.077
0.127	0.035	3.62857	82.918	62.002	1.33734	0.113	0.099	1.14141	82.814	78.451	1.05561							0.094	0.064	1.46875	112.47	105.864	1.0624	0.084	0.034	2.47059	88.264	81.973	1.07674	0.194	0.053	3.66038	74.219	46.037	1.61216	0.099	0.079	1.25316	88.342	80.846	1.09272	0.111	0.051	2.17647	101.755	67.979	1.49686	0.084	0.114
0.121	0.046	2.63043	84.898	78.13	1.08662	0.114	0.065	1.75385	77.593	74.11	1.047							0.105	0.069	1.52174	106.091	104.605	1.01421	0.152	0.057	2.66667	85.236	67.249	1.26747	0.234	0.057	4.10526	74.166	48.072	1.54281	0.113	0.065	1.73846	98.847	96.775	1.02141	0.078	0.091	0.857143	103.618	103.167	1.00437	0.126	0.134
0.155	0.08	1.9375	131.186	68.893	1.9042	0.148	0.048	3.08333	47.514	45.132	1.05278							0.183	0.103	1.7767	103.137	89.265	1.1554	0.105	0.07	1.5	100.874	99.618	1.01261	0.164	0.066	2.48485	116.131	66.644	1.74256	0.153	0.094	1.62766	85.719	81.8	1.04791	0.08	0.058	1.37931	101.139	100.543	1.00593	0.084	0.113
0.118	0.053	2.22642	109.728	107.65	1.0193	0.104	0.054	1.92593	72.963	72.249	1.00988							0.101	0.09	1.12222	110.433	94.462	1.16907	0.121	0.07	1.72857	126.091	107.955	1.168	0.147	0.056	2.625	127.224	107.43	1.18425	0.103	0.053	1.9434	84.207	79.992	1.05269	0.09	0.051	1.76471	90.956	87.727	1.03681	0.104	0.122
						0.076	0.048	1.58333	117.01	85.888	1.36236							0.133	0.108	1.23148	114.337	106.492	1.07367	0.135	0.059	2.28814	88.586	84.094	1.05342	0.105	0.038	2.76316	125.598	67.537	1.85969	0.093	0.056	1.66071	87.797	85.674	1.02478	0.128	0.073	1.75342	125.212	115.554	1.08358	0.156	0.166
						0.109	0.088	1.23864	130.236	101.526	1.28278							0.088	0.048	1.83333	97.334	92.224	1.05541	0.11	0.045	2.44444	99.728	80.764	1.23481	0.119	0.031	3.83871	83.301	48.945	1.70193	0.085	0.076	1.11842	130.822	127.716	1.02432	0.148	0.088	1.68182	115.019	90.777	1.26705	0.105	0.104
						0.101	0.09	1.12222	92.862	86.195	1.07735							0.186	0.116	1.60345	111.47	108.679	1.02568													0.105	0.066	1.59091	92.873	83.764	1.10875	0.105	0.075	1.4	107.386	107.233	1.00143	0.127	0.125
						0.097	0.099	0.979798	111.258	107.623	1.03378							0.079	0.109	0.724771	141.34	137.17	1.0304													0.111	0.068	1.63235	106.39	96.663	1.10063	0.78	0.48	1.625	103.557	103.459	1.00095	0.172	0.152
						0.091	0.055	1.65455	103.346	95.681	1.08011							0.076	0.07	1.08571	129.738	123.17	1.05332													0.115	0.056	2.05357	105.115	104.767	1.00332	0.079	0.046	1.71739	113.009	96.92	1.166	0.078	0.075
						0.074	0.05	1.48	94.677	80.311	1.17888							0.115	0.055	2.09091	79.094	71.099	1.11245													0.124	0.09	1.37778	78.325	77.902	1.00543	0.112	0.083	1.3494	99.185	98.644	1.00548	0.16	0.165
																																				0.104	0.119	0.87395	105.277	100.058	1.05216	0.111	0.066	1.68182	100.939	83.157	1.21384	0.081	0.062
																																				0.101	0.09	1.12222	105.133	95.687	1.09872	0.061	0.044	1.38636	98.584	94.457	1.04369	0.083	0.116
																																				0.067	0.061	1.09836	94.37	89.045	1.0598	0.115	0.06	1.91667	95.789	90	1.06432	0.058	0.089
																																				0.084	0.085	0.988235	107.428	104.145	1.03152	0.161	0.108	1.49074	105.607	105.548	1.00056	0.101	0.128
																																				0.12	0.11	1.09091	94.391	94.035	1.00379	0.111	0.069	1.6087	100.952	95.906	1.05261	0.119	0.146
																																				0.18	0.122	1.47541	106.678	101.38	1.05226	0.075	0.038	1.97368	97.696	90.945	1.07423	0.098	0.101
																																																0.097	0.105
																																																0.086	0.101
																																																0.085	0.081
																																																0.086	0.102
																																																0.103	0.064
																																																0.089	0.108
																																																0.096	0.097
																																																0.09	0.09
																																																0.059	0.063
																																																0.073	0.088
																																																0.071	0.054
																																																0.13	0.072
																																																0.152	0.065
																																																0.101	0.093
																																																0.116	0.08
																																																0.132	0.114
																																																0.108	0.056
																																																0.079	0.084
																																																0.13	0.13
																																																0.145	0.102
																																																0.112	0.119
																																																0.094	0.085
																																																0.132	0.103
																																																0.103	0.084
																																																0.082	0.076
																																																0.099	0.079
																																																0.076	0.062
																																																0.081	0.046
																																																0.128	0.092
																																																0.134	0.093
																																																0.121	0.071
																																																0.133	0.102
																																																0.105	0.043
																																																0.129	0.097
																																																0.088	0.065
																																																0.09	0.077
																																																0.105	0.086
																																																0.078	0.068
																																																0.113	0.119
																																																0.11	0.101
																																																0.132	0.135
																																																0.132	0.148
																																																0.167	0.124
																																																0.076	0.079
																																																0.096	0.097
																																																0.092	0.049
																																																0.092	0.066
																																																0.101	0.106
																																																0.059	0.085
																																																0.097	0.072
																																																0.062	0.092
																																																0.06	0.077
																																																0.137	0.088
																																																0.09	0.107
																																																0.1	0.093
																																																0.118	0.057
																																																0.094	0.084
																																																0.133	0.113
																																																0.155	0.15
																																																0.083	0.084
																																																0.121	0.105
																																																0.118	0.115
																																																0.093	0.087
																																																0.139	0.084
																																																0.046	0.049
																																																0.116	0.146
																																																0.078	0.072
																																																0.076	0.074
																																																0.113	0.084
																																																0.107	0.063
																																																0.053	0.048
																																																0.054	0.079
																																																0.083	0.075
																																																0.106	0.118
																																																0.057	0.062
																																																0.084	0.055
																																																0.101	0.103
																																																0.072	0.08
																																																0.12	0.111
																																																0.079	0.059
																																																0.139	0.119
																																																0.042	0.04
																																																0.073	0.064
																																																0.171	0.1
																																																0.078	0.065
																																																0.081	0.08
																																																0.095	0.069
																																																0.126	0.15
																																																0.082	0.096
																																																0.071	0.076
																																																0.086	0.076
																																																0.068	0.081
																																																0.076	0.057
																																																0.067	0.053
																																																0.09	0.083
																																																0.076	0.055
[truncated: 10 more columns]
