# Supplementary material for: Fossil and Genetic Evidence for the Polyphyletic Nature of the Planktonic Foraminifera "Globigerinoides", and Description of the New Genus Trilobatus
Source: PLoS One. 2015 May 28;10(5):e0128108. doi: 10.1371/journal.pone.0128108 (PMC4447400; doi:10.1371/journal.pone.0128108)
Supplement: S4 Table — (XLSX) [file pone.0128108.s004.xlsx]

## Sheet: S4
Globigerinoides primordius						Globigerinoides quadrilobatus						Globigerinoides trilobus						Globigerinoides altiaperturus						Globigerinoides subsacculifer						Globigerinoides immaturus						Globigerinoides parawoodi						Globigerinoides subquadratus						Globigerinoies praeimmaturus
Max. width	Max. height	Width/Height	Large angle	Small angle	L/S	Max. width	Max. height	Width/Height	Large angle	Small angle	L/S	Max. width	Max. height	Width/Height	Large angle	Small angle	L/S	Max. width	Max. height	Width/Height	Large angle	Small angle	L/S	Max. width	Max. height	Width/Height	Large angle	Small angle	L/S	Max. width	Max. height	Width/Height	Large angle	Small angle	L/S	Max. width	Max. height	Width/Height	Large angle	Small angle	L/S	Max. width	Max. height	Width/Height	Large angle	Small angle	L/S	Max. width	Max. height
0.196	0.088	2.22727	108.508	63.033	1.72145	0.118	0.057	2.07018	125.131	118.072	1.05979	0.154	0.078	1.97436	74.982	48.841	1.53523	0.142	0.116	1.22414	117.638	111.866	1.0516	0.156	0.021	7.42857	117.387	57.529	2.04048	0.172	0.055	3.12727	70.371	51.081	1.37764	0.103	0.085	1.21176	116.565	110.526	1.05464	0.084	0.099	0.848485	111.801	102.089	1.09513	0.128	0.049
0.173	0.112	1.54464	123.628	93.187	1.32667	0.144	0.107	1.34579	112.383	111.235	1.01032	0.172	0.096	1.79167	90.955	56.252	1.61692	0.09	0.086	1.04651	108.75	106.6	1.02017	0.107	0.051	2.09804	123.69	76.329	1.62049	0.136	0.051	2.66667	114.31	69.814	1.63735	0.09	0.092	0.978261	120.778	115.882	1.04225	0.089	0.084	1.05952	112.872	106.679	1.05805
0.19	0.093	2.04301	78.952	71.652	1.10188	0.112	0.08	1.4	87.287	85.988	1.01511	0.138	0.065	2.12308	68.307	53.521	1.27627	0.143	0.095	1.50526	99.508	92.197	1.0793	0.135	0.067	2.01493	108.011	86.711	1.24564	0.144	0.056	2.57143	73.978	52.613	1.40608	0.089	0.067	1.32836	111.669	106.331	1.0502	0.109	0.086	1.26744	83.491	80.362	1.03894
						0.149	0.11	1.35455	108.337	99.368	1.09026	0.101	0.04	2.525	67.874	48.751	1.39226	0.099	0.075	1.32	110.259	109.86	1.00363	0.19	0.088	2.15909	93.871	71.693	1.30935	0.146	0.051	2.86275	81.573	46.09	1.76986	0.091	0.083	1.09639	111.423	109.822	1.01458	0.078	0.076	1.02632	107.047	92.595	1.15608
						0.113	0.078	1.44872	105.94	104.788	1.01099	0.218	0.05	4.36	49.827	32.135	1.55055	0.12	0.057	2.10526	87.73	69.404	1.26405	0.24	0.06	4	71.105	43.278	1.64298	0.137	0.053	2.58491	108.104	94.309	1.14627	0.104	0.108	0.962963	113.839	65.802	1.73002	0.097	0.108	0.898148	114.344	112.814	1.01356
						0.111	0.085	1.30588	104.971	100.426	1.04526	0.203	0.049	4.14286	31.504	20.854	1.51069	0.116	0.082	1.41463	119.038	101.586	1.1718	0.212	0.054	3.92593	60.362	51.779	1.16576	0.17	0.039	4.35897	64.757	30.509	2.12255	0.161	0.083	1.93976	96.99	84.806	1.14367	0.047	0.064	0.734375	103.853	92.361	1.12442
						0.14	0.118	1.18644	126.994	119.068	1.06657	0.175	0.049	3.57143	44.016	31.096	1.41549	0.138	0.104	1.32692	121.664	121.376	1.00237	0.149	0.065	2.29231	86.667	81.169	1.06774	0.218	0.046	4.73913	63.042	45.334	1.39061	0.066	0.073	0.90411	97.135	95.44	1.01776	0.104	0.068	1.52941	83.199	81.591	1.01971
						0.146	0.113	1.29204	101.654	96.833	1.04979	0.135	0.049	2.7551	51.34	31.86	1.61142	0.132	0.074	1.78378	89.736	80.599	1.11336	0.235	0.053	4.43396	85.78	52.527	1.63306	0.188	0.062	3.03226	95.094	66.824	1.42305	0.102	0.115	0.886957	128.424	106.26	1.20858	0.075	0.067	1.1194	99.824	95.716	1.04292
						0.184	0.077	2.38961	49.509	46.759	1.05881	0.176	0.06	2.93333	72.474	30.725	2.3588	0.116	0.106	1.09434	121.993	110.936	1.09967	0.163	0.055	2.96364	57.639	44.018	1.30944	0.256	0.054	4.74074	63.741	46.813	1.36161	0.115	0.081	1.41975	128.811	124.182	1.03728	0.121	0.144	0.840278	140.412	136.381	1.02956
						0.109	0.051	2.13725	57.095	53.943	1.05843	0.11	0.057	1.92982	72.051	52.672	1.36792	0.108	0.095	1.13684	128.828	117.061	1.10052	0.203	0.048	4.22917	74.193	36.644	2.0247	0.17	0.044	3.86364	65.711	49.303	1.3328	0.068	0.084	0.809524	110.294	107.403	1.02692	0.115	0.113	1.0177	96.147	89.66	1.07235
						0.116	0.084	1.38095	105.309	102.127	1.03116	0.202	0.047	4.29787	36.485	22.834	1.59784	0.085	0.059	1.44068	105.219	96.739	1.08766	0.223	0.058	3.84483	95.791	46.825	2.04572	0.219	0.094	2.32979	105.224	74.436	1.41362	0.075	0.063	1.19048	109.353	108.644	1.00653	0.077	0.064	1.20312	107.393	103.536	1.03725
						0.121	0.103	1.17476	131.488	126.333	1.0408	0.21	0.046	4.56522	34.987	23.951	1.46077	0.084	0.055	1.52727	139.67	134.287	1.04009	0.212	0.034	6.23529	82.89	62.103	1.33472	0.216	0.053	4.07547	49.338	26.286	1.87697	0.106	0.07	1.51429	104.145	101.428	1.02679	0.086	0.083	1.03614	125.407	111.595	1.12377
						0.133	0.045	2.95556	58.842	58.353	1.00838	0.158	0.029	5.44828	32.065	20.204	1.58706							0.138	0.037	3.72973	100.923	73.962	1.36453	0.248	0.086	2.88372	51.45	44.853	1.14708	0.136	0.077	1.76623	124.808	103.392	1.20713	0.084	0.076	1.10526	101.012	98.749	1.02292
						0.097	0.07	1.38571	112.043	109.767	1.02073	0.214	0.042	5.09524	36.121	27.366	1.31992							0.217	0.067	3.23881	85.716	47.597	1.80087	0.17	0.059	2.88136	60.675	48.123	1.26083	0.109	0.083	1.31325	126.009	122.358	1.02984	0.079	0.084	0.940476	101.895	100.245	1.01646
						0.122	0.097	1.25773	107.309	103.154	1.04028	0.182	0.064	2.84375	43.809	43.022	1.01829							0.177	0.049	3.61224	134.004	98.746	1.35706	0.167	0.044	3.79545	71.434	39.481	1.80933	0.125	0.08	1.5625	108.435	108.02	1.00384	0.065	0.073	0.890411	102.157	101.326	1.0082
						0.107	0.083	1.28916	114.358	104.405	1.09533	0.166	0.045	3.68889	35.665	33.017	1.0802							0.186	0.049	3.79592	100.491	81.67	1.23045	0.222	0.066	3.36364	121.159	81.573	1.48528	0.093	0.05	1.86	104.459	95.711	1.0914	0.114	0.108	1.05556	98.231	97.125	1.01139
						0.153	0.06	2.55	68.007	46.218	1.47144	0.18	0.08	2.25	75.877	39.169	1.93717							0.147	0.062	2.37097	112.531	81.703	1.37732	0.117	0.042	2.78571	111.309	92.148	1.20794	0.111	0.097	1.14433	134.907	122.307	1.10302	0.092	0.069	1.33333	78.503	78.226	1.00354
												0.203	0.035	5.8	87.064	17.76	4.90225							0.205	0.055	3.72727	70.44	57.898	1.21662	0.153	0.056	2.73214	95.839	67.163	1.42696	0.095	0.079	1.20253	138.457	120.32	1.15074	0.095	0.107	0.88785	123.127	122.125	1.0082
												0.191	0.049	3.89796	37.879	27.582	1.37332							0.168	0.046	3.65217	133.17	83.454	1.59573	0.175	0.06	2.91667	78.001	49.086	1.58907	0.103	0.069	1.49275	112.464	100.641	1.11748	0.055	0.08	0.6875	124.107	123.72	1.00313
												0.198	0.057	3.47368	35.391	30.853	1.14708													0.174	0.063	2.7619	91.475	71.565	1.27821	0.1	0.079	1.26582	120.964	109.052	1.10923	0.103	0.087	1.18391	99.63	94.862	1.05026
												0.215	0.044	4.88636	39.047	27.983	1.39538													0.316	0.08	3.95	109.853	31.936	3.43979							0.092	0.056	1.64286	92.187	87.837	1.04952
												0.231	0.065	3.55385	55.312	36.963	1.49642													0.147	0.047	3.12766	131.505	84.735	1.55196							0.067	0.057	1.17544	83.438	80.797	1.03269
												0.175	0.051	3.43137	71.857	42.801	1.67886													0.12	0.034	3.52941	100.305	87.368	1.14807							0.1	0.075	1.33333	113.438	77.822	1.45766
												0.228	0.059	3.86441	39.859	27.868	1.43028													0.109	0.028	3.89286	98.055	58.799	1.66763							0.095	0.098	0.969388	99.923	99.331	1.00596
												0.254	0.074	3.43243	41.527	31.218	1.33023													0.1	0.033	3.0303	94.931	61.95	1.53238							0.057	0.061	0.934426	107.403	100.249	1.07136
												0.201	0.086	2.33721	52.301	43.887	1.19172													0.116	0.067	1.73134	103.671	93.594	1.10767							0.087	0.086	1.01163	102.812	95.372	1.07801
												0.16	0.03	5.33333	30.703	21.297	1.44166													0.131	0.053	2.4717	122.574	101.023	1.21333							0.108	0.087	1.24138	102.685	96.736	1.0615
												0.093	0.03	3.1	65.186	48.395	1.34696													0.193	0.048	4.02083	72.441	60.826	1.19095							0.07	0.077	0.909091	117.387	105.803	1.10949
												0.167	0.055	3.03636	48.542	35.169	1.38025													0.14	0.055	2.54545	81.921	55.96	1.46392							0.11	0.091	1.20879	102.247	102.032	1.00211
												0.147	0.045	3.26667	36.787	27.773	1.32456													0.13	0.055	2.36364	90.899	75.29	1.20732							0.062	0.067	0.925373	101.889	101.773	1.00114
												0.129	0.037	3.48649	48.961	34.781	1.40769													0.2	0.073	2.73973	78.437	67.878	1.15556							0.058	0.054	1.07407	117.584	101.165	1.1623
												0.06	0.05	1.2	88.21	78.503	1.12365													0.129	0.052	2.48077	102.423	73.792	1.388							0.061	0.049	1.2449	125.149	118.474	1.05634
												0.131	0.052	2.51923	47.841	39.572	1.20896													0.129	0.065	1.98462	60.209	56.346	1.06856							0.075	0.098	0.765306	133.541	116.809	1.14324
												0.279	0.043	6.48837	24.138	18.24	1.32336													0.196	0.059	3.32203	83.599	57.612	1.45107							0.081	0.066	1.22727	84.206	81.559	1.03246
												0.165	0.053	3.11321	54.234	25.817	2.10071													0.193	0.046	4.19565	68.839	40.074	1.7178							0.081	0.09	0.9	94.314	93.262	1.01128
																														0.14	0.028	5	63.684	61.04	1.04332							0.12	0.108	1.11111	93.526	84.666	1.10465
																														0.125	0.051	2.45098	115.547	98.326	1.17514							0.14	0.062	2.25806	55.099	47.236	1.16646
																														0.106	0.037	2.86486	95.847	67.345	1.42322							0.054	0.098	0.55102	125.574	125.214	1.00288
																														0.143	0.046	3.1087	69.764	47.647	1.46418							0.054	0.091	0.593407	99.072	95.669	1.03557
																														0.176	0.073	2.41096	82.048	72.456	1.13238							0.091	0.101	0.90099	104.442	102.011	1.02383
																														0.099	0.036	2.75	87.879	56.515	1.55497							0.098	0.09	1.08889	99.572	87.731	1.13497
																														0.116	0.049	2.36735	86.82	67.232	1.29135							0.105	0.052	2.01923	91.46	81.832	1.11766
																														0.185	0.049	3.77551	67.585	51.416	1.31447							0.08	0.08	1	113.682	107.263	1.05984
																														0.189	0.057	3.31579	101.31	88.75	1.14152							0.105	0.104	1.00962	118.023	110.022	1.07272
																														0.181	0.051	3.54902	101.07	78.179	1.2928							0.067	0.106	0.632075	112.255	107.819	1.04114
																														0.127	0.056	2.26786	76.862	56.252	1.36639							0.057	0.084	0.678571	127.957	118.65	1.07844
																																										0.072	0.079	0.911392	118.971	117.446	1.01298
[truncated: 4 more columns]
